# Supplementary material for: Tau Regulates Glioblastoma Progression, 3D Cell Organization, Growth and Migration via the PI3K-AKT Axis
Source: MDPI journal article supplement (doi:10.3390/cancers13225818), 2021-11-19

RAW western blot

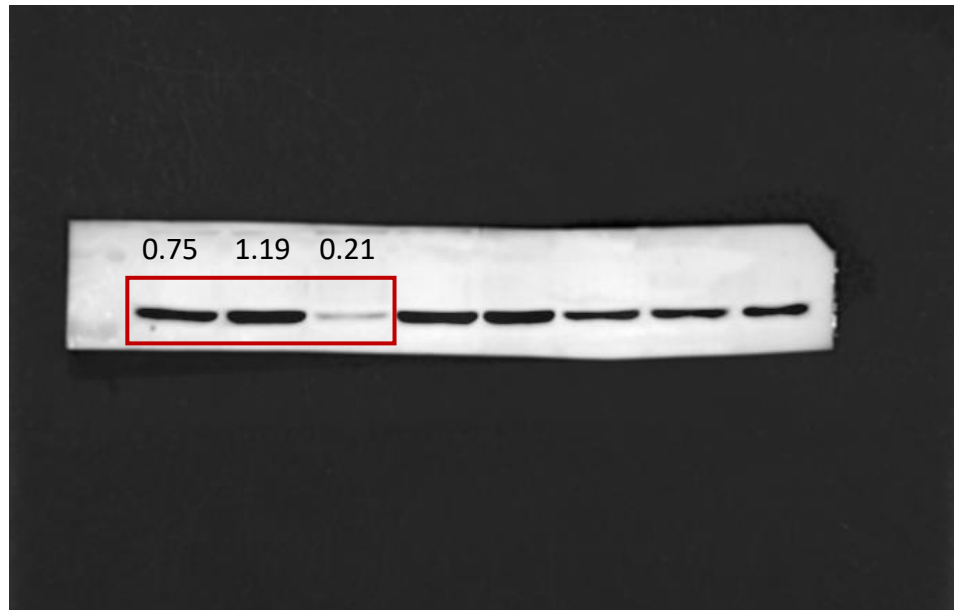

TAU

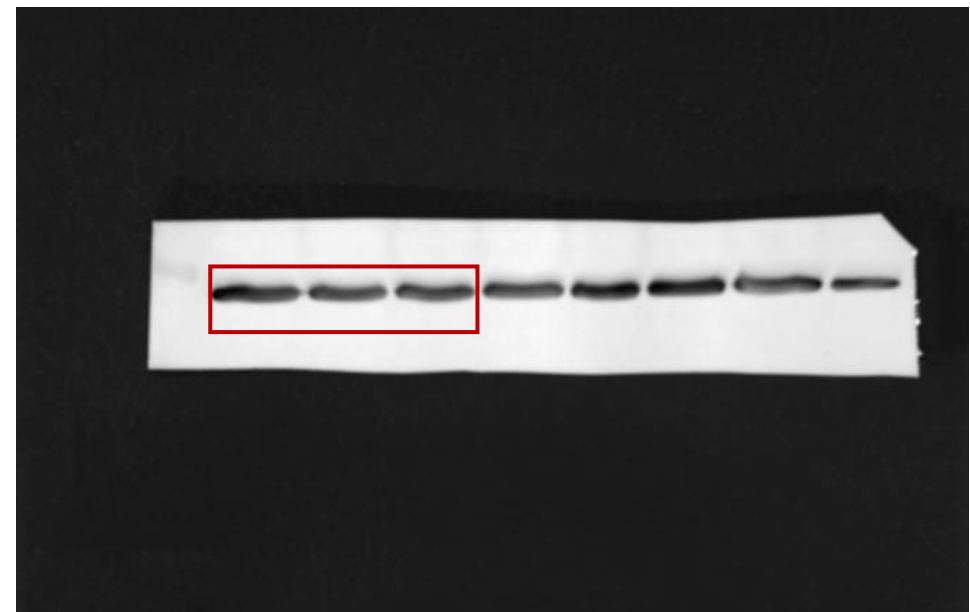

GAPDH

**Figure 1A**

Integrated density values (ratio on GAPDH values)

N-cadherin

0.26      0.50

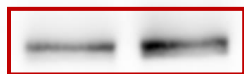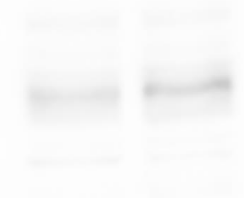

GAPDH

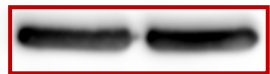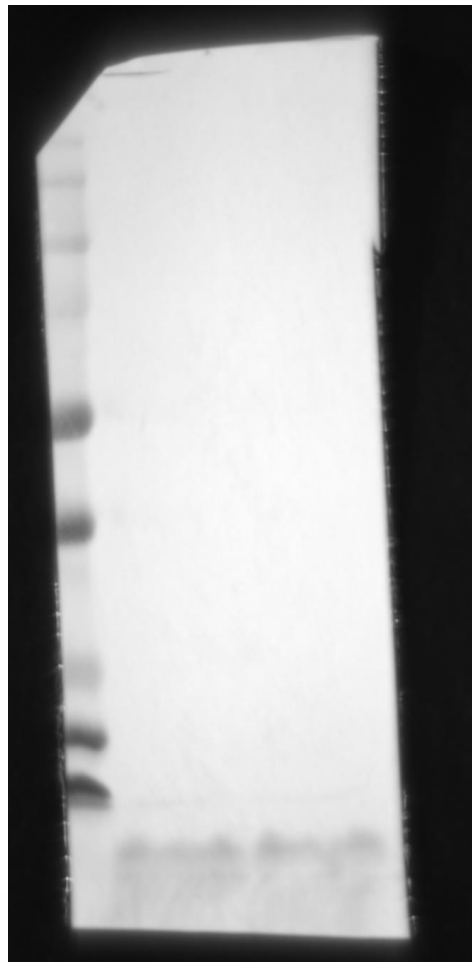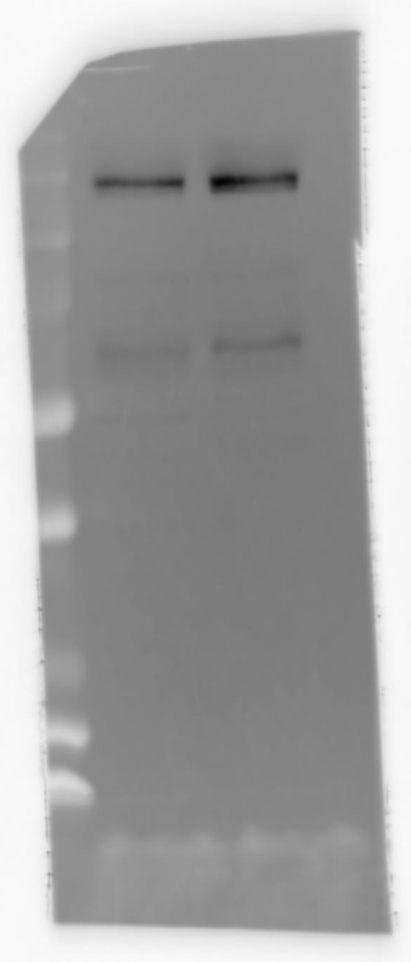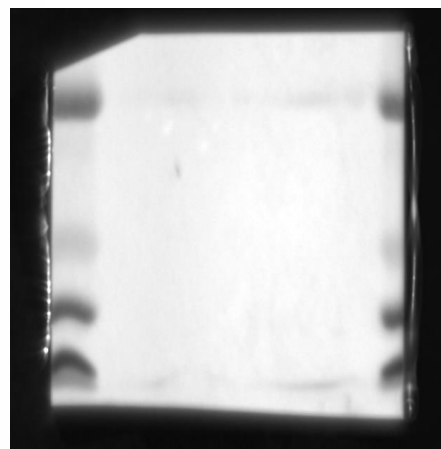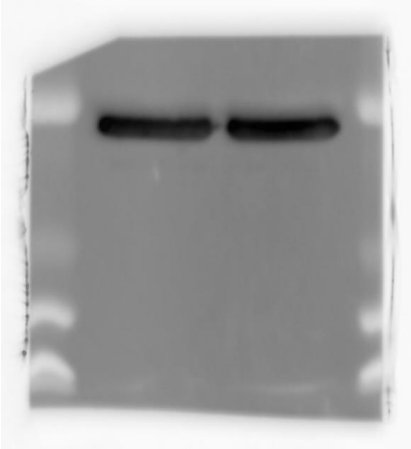

Figure 4A

Figure 4A

N-cadherin

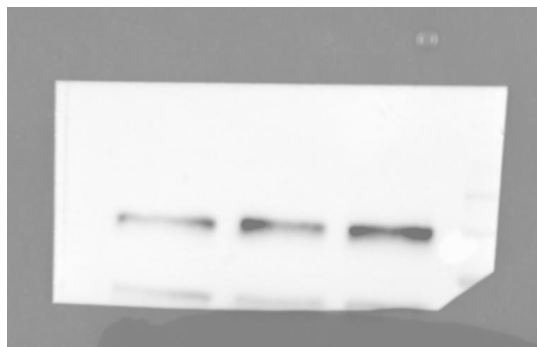

$\beta$ -catenin

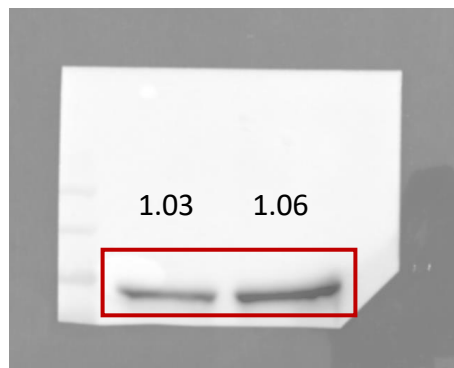

$\beta$ -actin

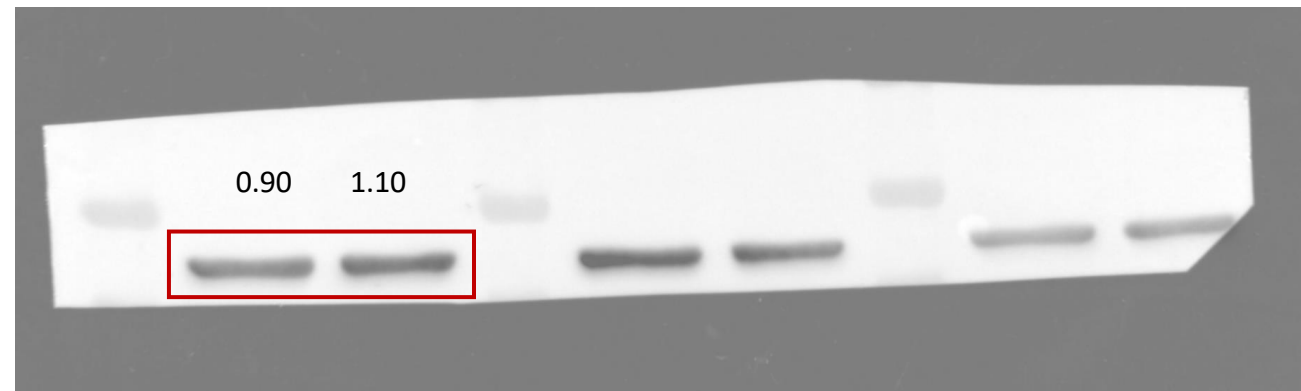

GAPDH

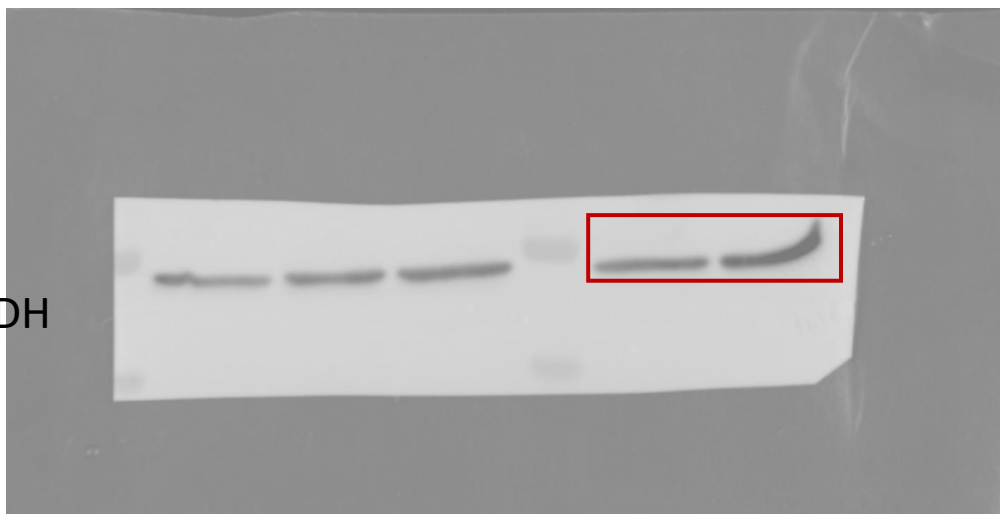

GAPDH

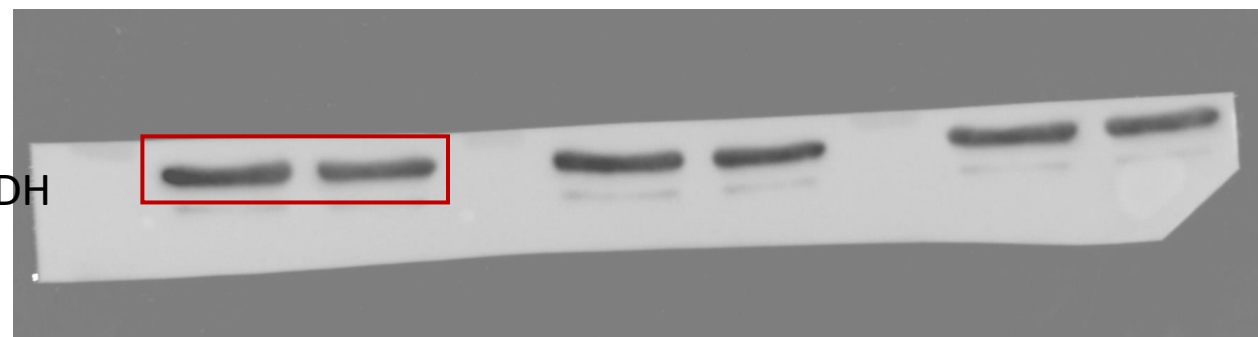

**Figure 6B**

Akt-pSer473

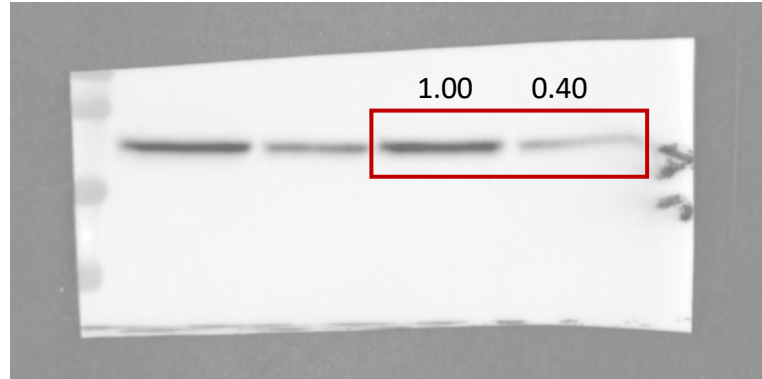

Akt

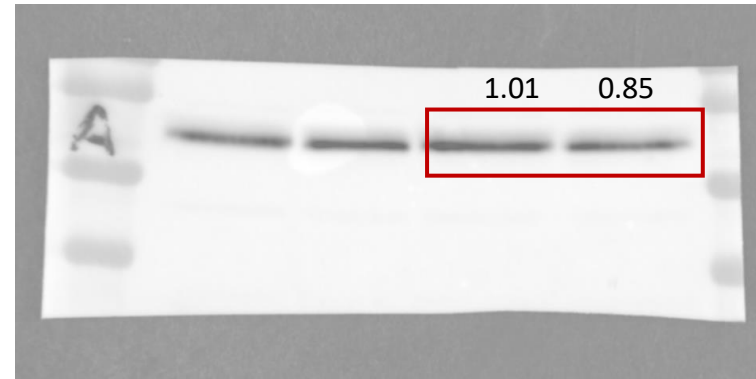

GAPDH

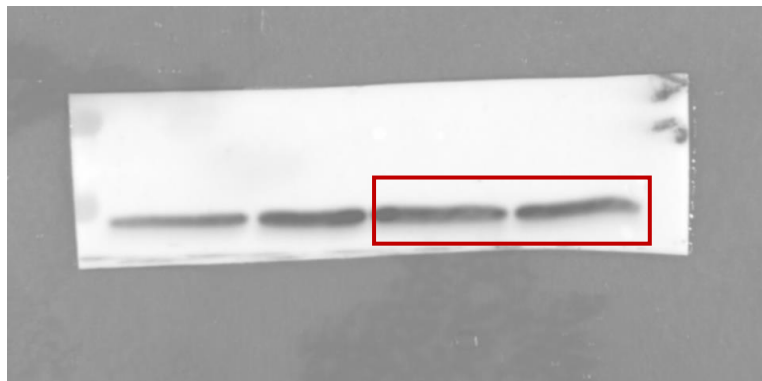

**Figure 6B**

Akt-pThr308

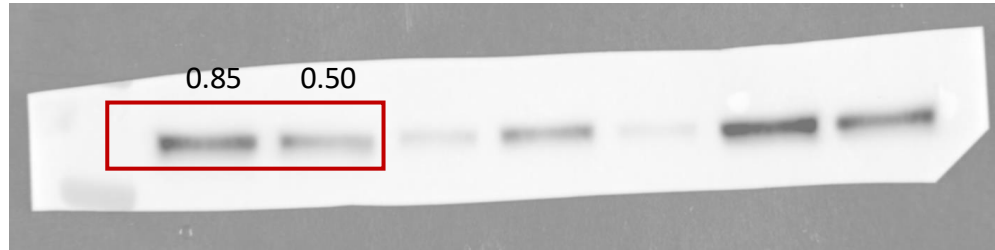

GAPDH

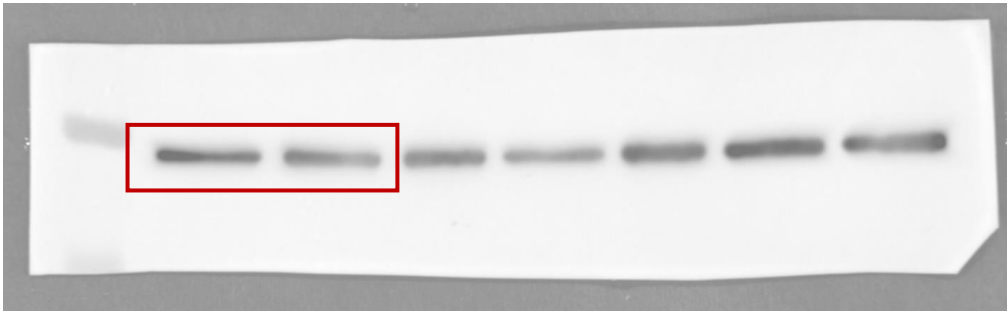

Akt

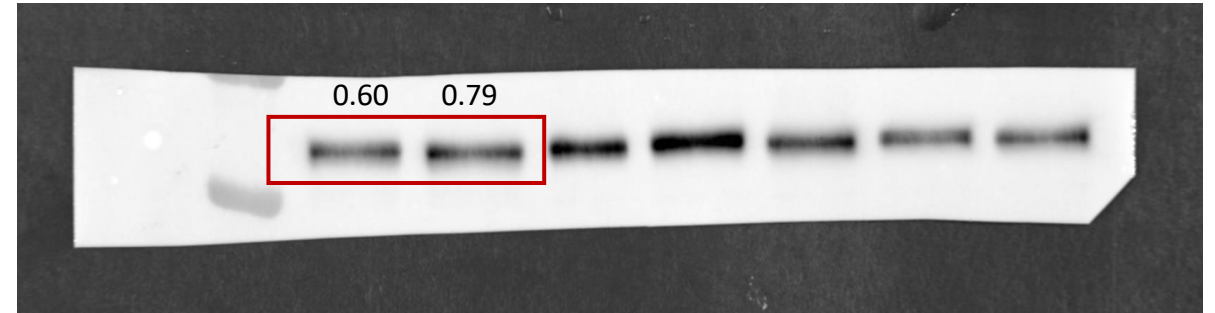

**Figure S4**

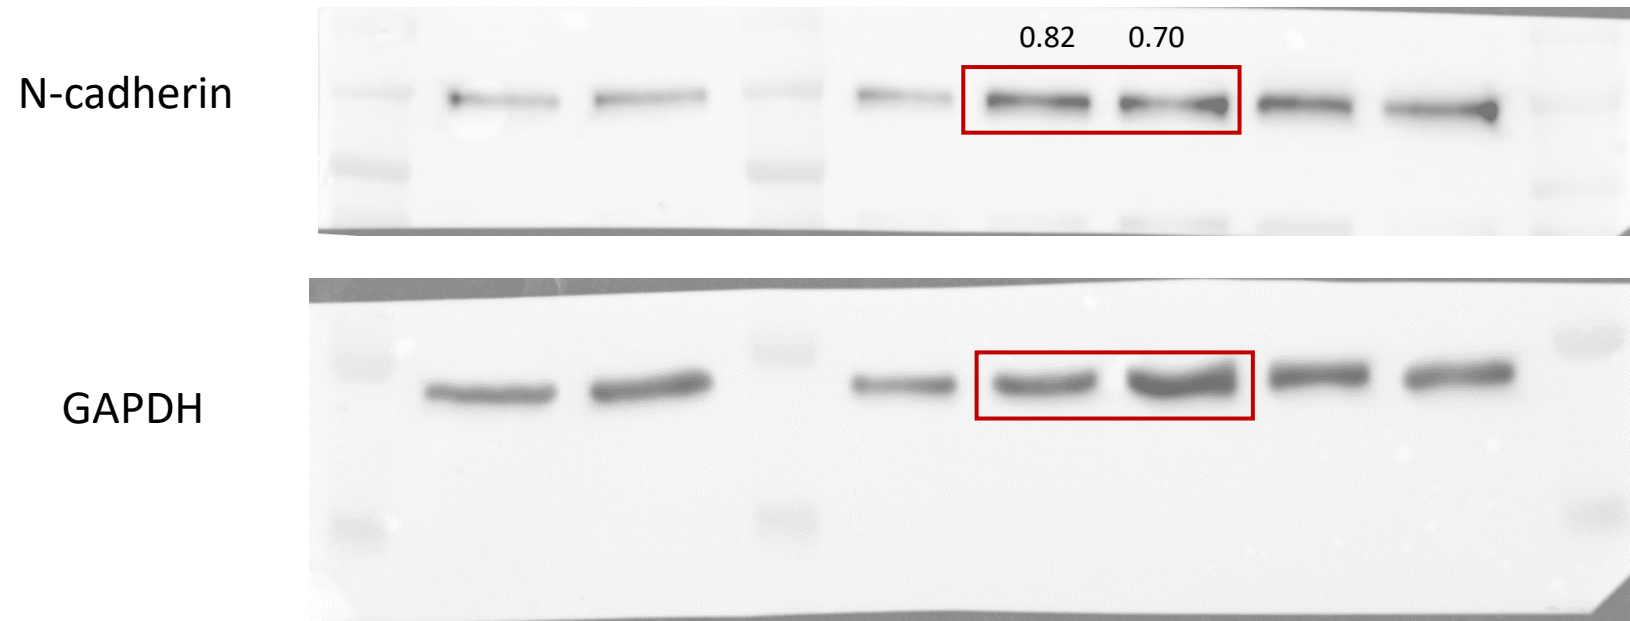

Supplement: s1 [file s1]
