# Supplementary material for: Tau Regulates Glioblastoma Progression, 3D Cell Organization, Growth and Migration via the PI3K-AKT Axis
Source: MDPI journal article supplement (doi:10.3390/cancers13225818), 2021-11-19
Supplement: s1 [file s1]

## *Supplementary material*

# **Tau regulates tumor progression, three-D cellular spheroid organization, growth and evasion in glioblastoma via the N-cadherin -PI3K-AKT axis.**

Alessandra Pagano <sup>1</sup>, Gilles Breuzard <sup>1</sup>, Fabrice Parat<sup>1</sup>, Aurélie Tchogandjian<sup>2</sup>, Dominique Figarella-Branger<sup>2</sup>, Tiphany Coralie De Bessa<sup>3</sup>, Françoise Garrouste <sup>1</sup>, Alexis Douence<sup>1</sup>, Pascale Barbier<sup>1</sup> and Hervé Kovacic <sup>1</sup>

## *Supplementary methods*

**MCS aggregation assay.** For time course analysis of MCS formation, cells (5000 cells per well) were let to aggregate for 24hs to form MCS in 96-well suspension culture U bottom plates, as described in material and method sections. Cell aggregation in methylcellulose analysed by a wide-field inverted microscope, equipped with an air objectif 4x and connected to a CCD camera, as described in material and method sections. One image per MCS was taken at 0-2-4-6-8 and 24 hours. The area occupied by aggregating cells was measured by Image J software and expressed as the ratio between the area at each time point on area mean at time 2h.

**Viability assay (MTT).** U87shctrl and U87shTau cells were plated in 96p well plates (5000 cells/well). At time 0-24-48-72h after plating, Thiazolyl Blue Tetrazolium Bromide was added (MTT reagent, Sigma -Aldrich 0.5 mg/ml final concentration) and incubated for 2hr. Reagent was removed, and formazan precipitates were dissolved with DMSO. OD<sub>600</sub> was measured by a spectrophotometer.

**Cell adhesion assay to ECM.** Cell adhesion assay was performed as previously described (Delamarre *et al*, 2009) briefly, flat bottom 96-well microtiter plates (maxisorp, Nunc) were coated with one of the following purified extracellular matrix (ECM): fibronectin (10 µg/ml), vitronectin (10 µg/ml), type I collagen (10 µg/ml) and were blocked with BSA. U87shctrl and U87shTau cells were harvested in single cell suspension, suspended in EMEM containing 0.2% BSA (adhesion buffer) and allowed to adhere 30 minutes to the substrate at 37°C. Unattached cells were removed by gently washing three times with adhesion buffer. Residual attached cells were fixed by 1% glutaraldehyde, stained by 0.1% crystal violet and lysed with 1% SDS. Absorbance was then measured at 600 nm by a microplate reader. Results were expressed as % of total unwashed cell adhesion (mean ± SEM n=3, more than 3 experiments).

**Immunofluorescence of 2D-cell culture-** Immunostaining of N-cadherin was done according protocols previously described (Breuzard *et al*, 2019). Antibodies used were the same as described in material and method section.
